# Supplementary material for: Mapping the Dynamics of Contemporary PRRSV-2 Evolution and Its Emergence and Spreading Hotspots in the U.S. Using Phylogeography
Source: MDPI journal article supplement (doi:10.3390/pathogens12050740), 2023-05-20
Supplement: s1 [file s1]

Supplementary data

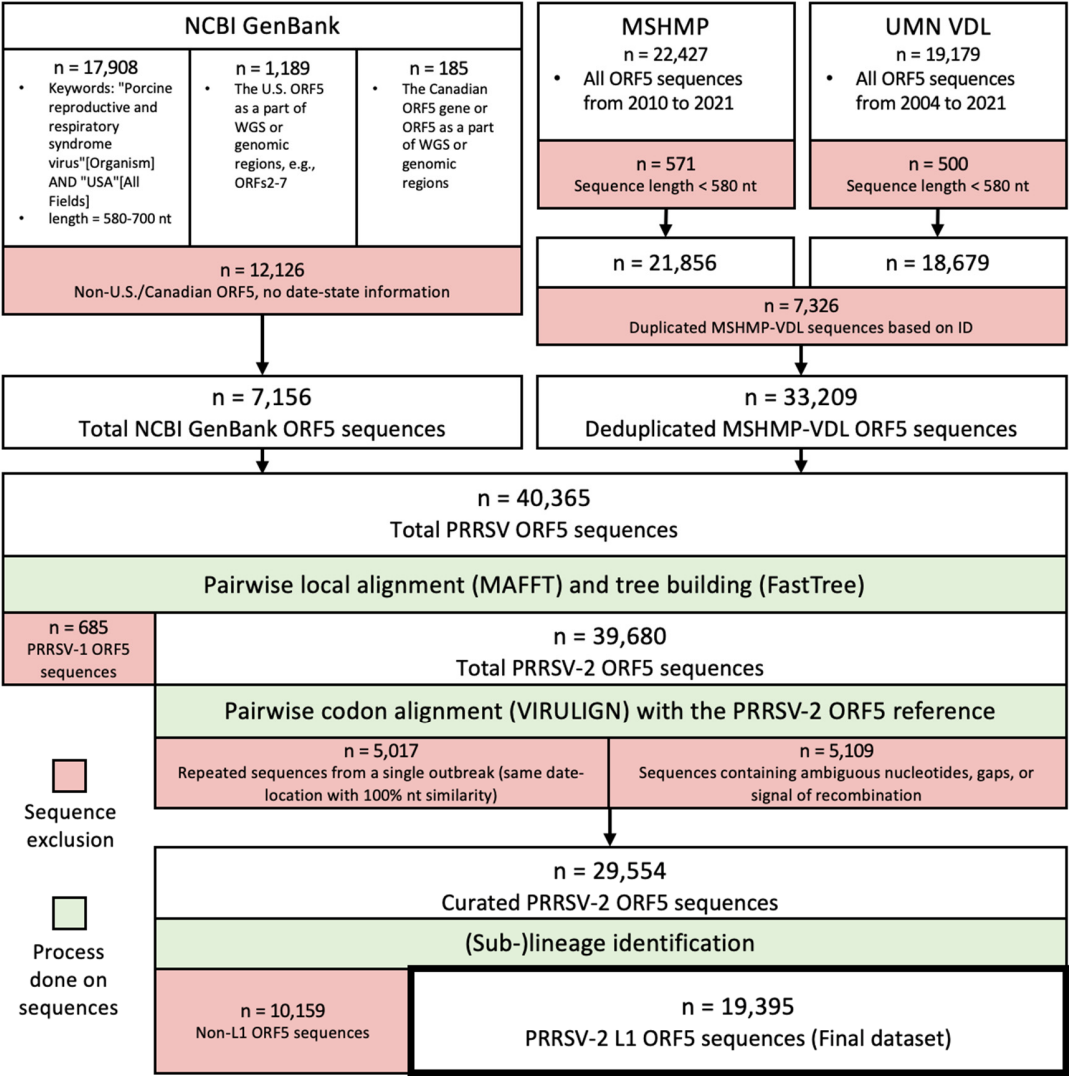

Supplementary Figure S1. ORF5 sequences gathering and filtering process.

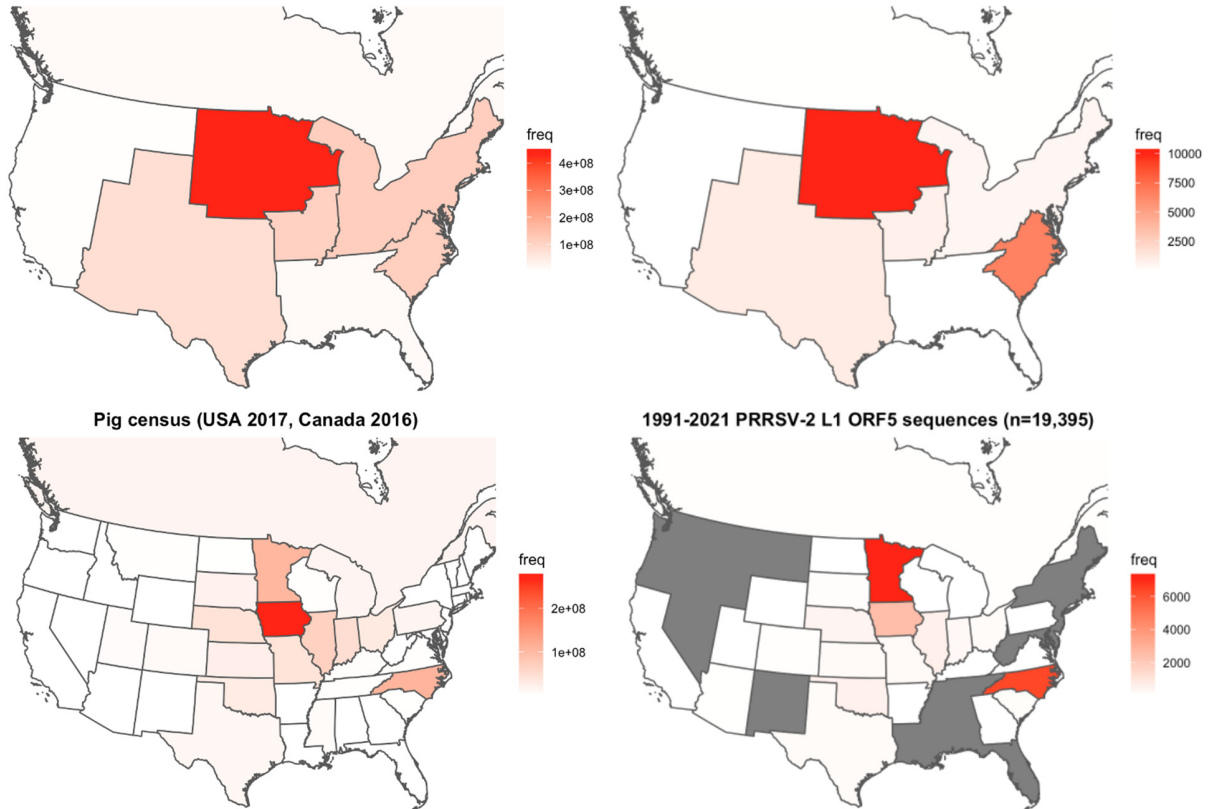

Supplementary Figure S2. Geographical distribution of pig farming (left) and ORF5 sequences from the full dataset (right) by region (top) and state (bottom).

Spatio-temporal stratified sampling\*

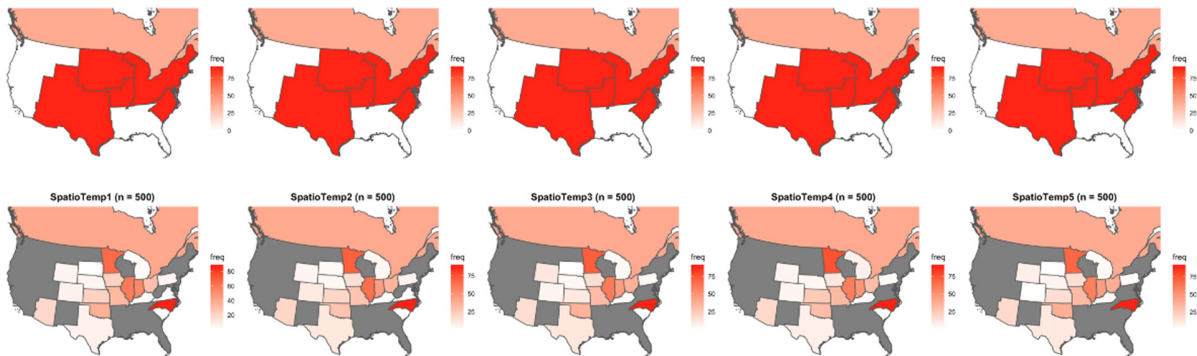

Spatial stratified sampling

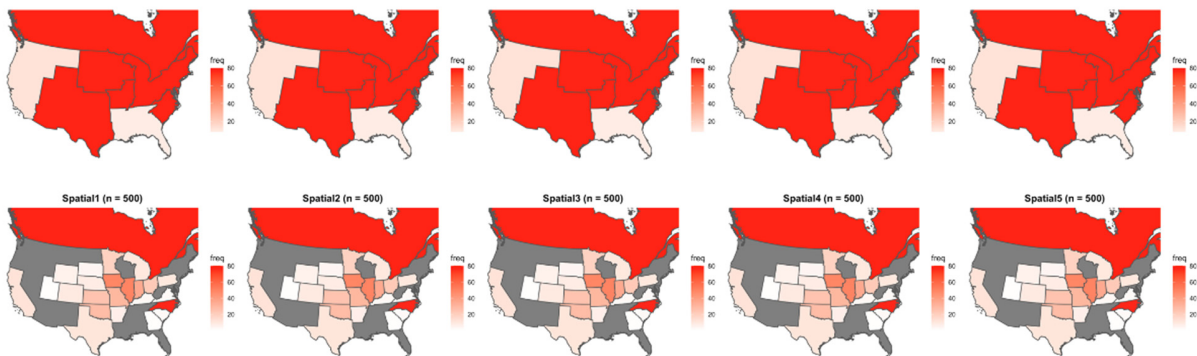

Proportionate stratified sampling

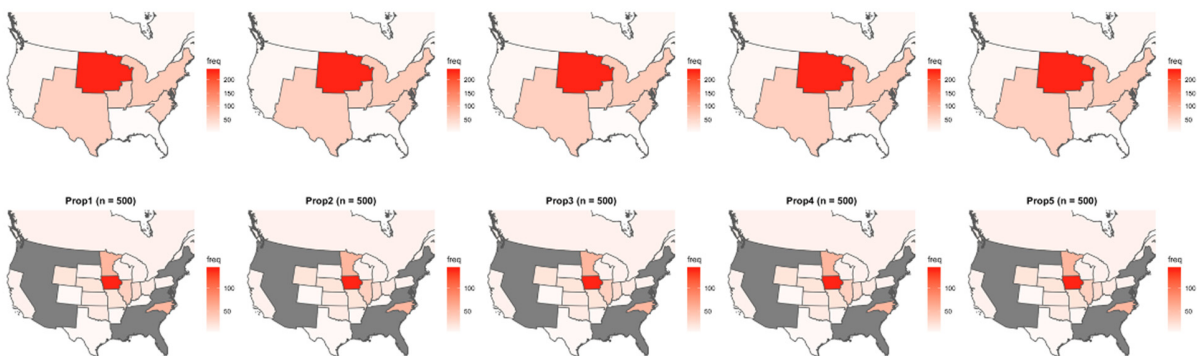

Supplementary Figure S3. Geographical distribution of ORF5 sequences from each subsampled dataset.

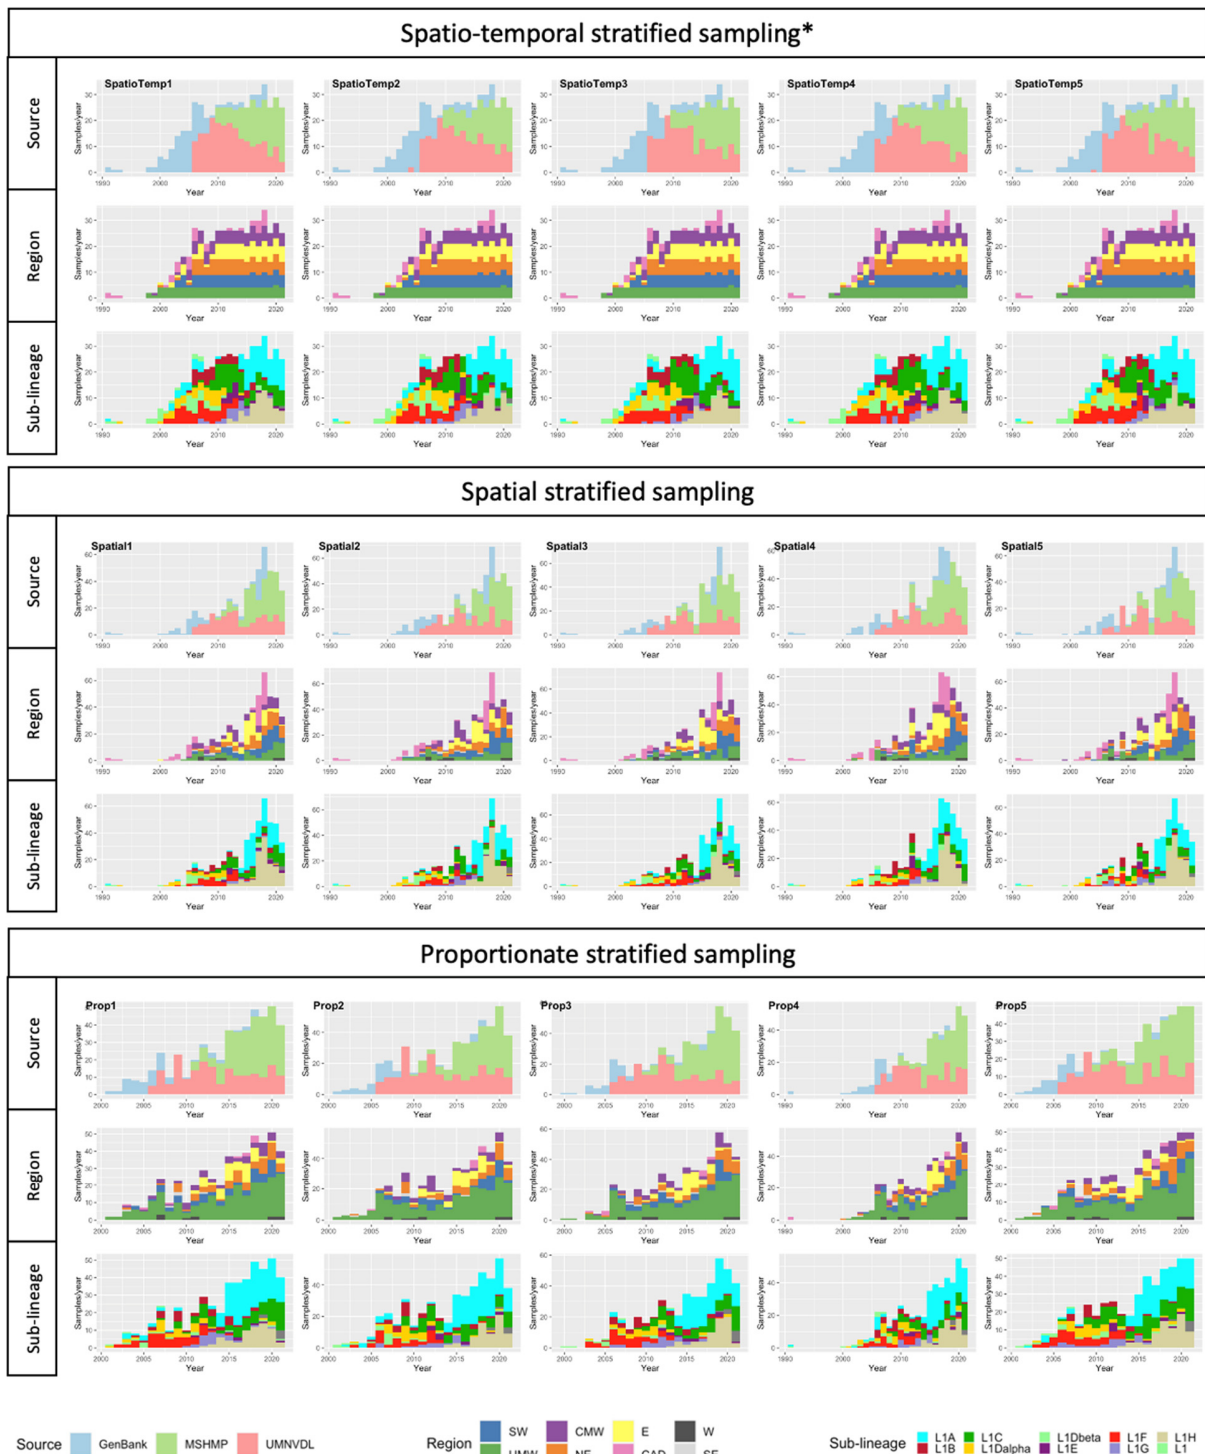

Supplementary Figure S4. Temporal distribution of ORF5 sequences from each subsampled dataset colored by source, sampling region, and pre-identified sub-lineage.

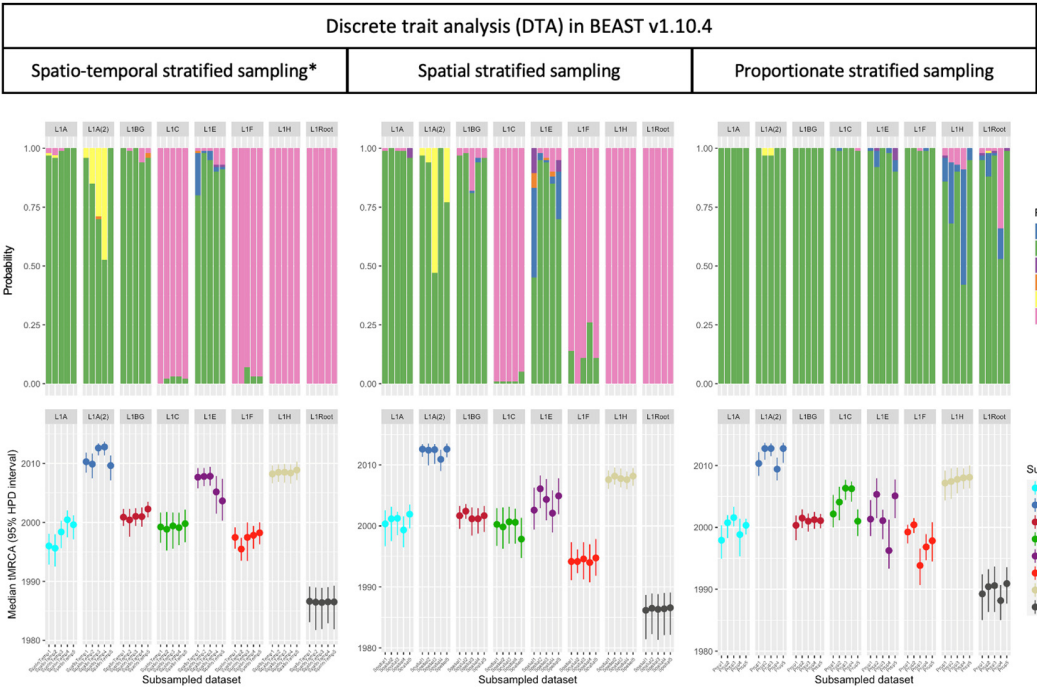

Supplementary Figure S5. Probability of region of origin (top) and Median tMRCA with 95% HPD interval (bottom) of each L1 sub-lineage and overall L1 from all runs compared between different subsampling techniques.

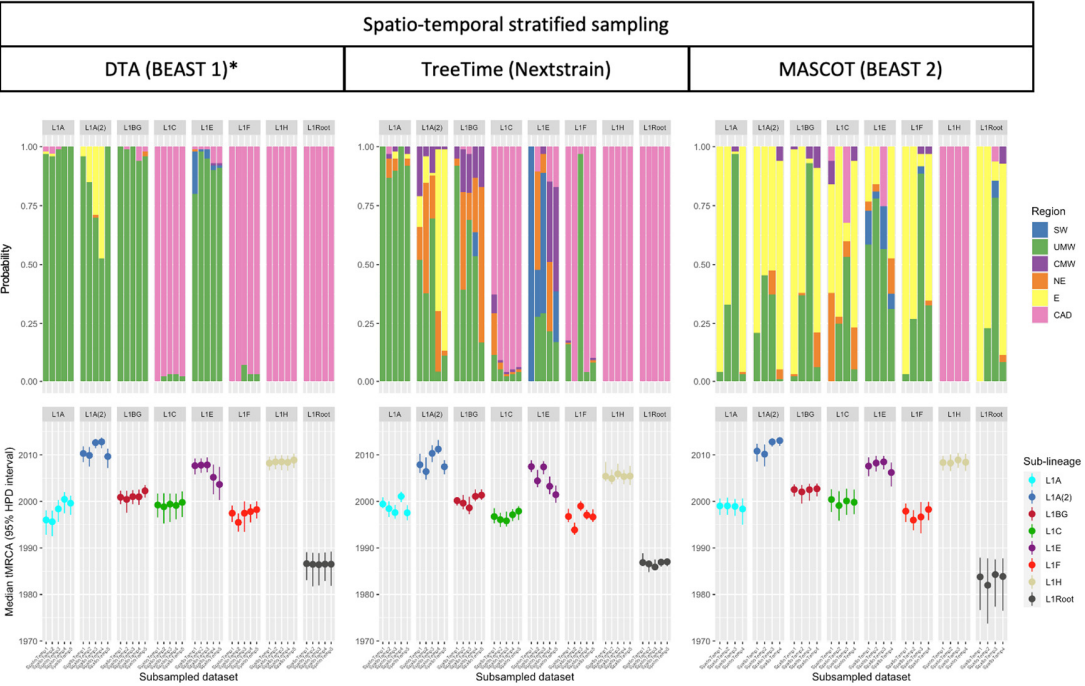



Supplementary Figure S6. Probability of region of origin (top) and Median tMRCA with 95% HPD interval (bottom) of each L1 sub-lineage and overall L1 from all runs compared between different phylogeographic approaches.

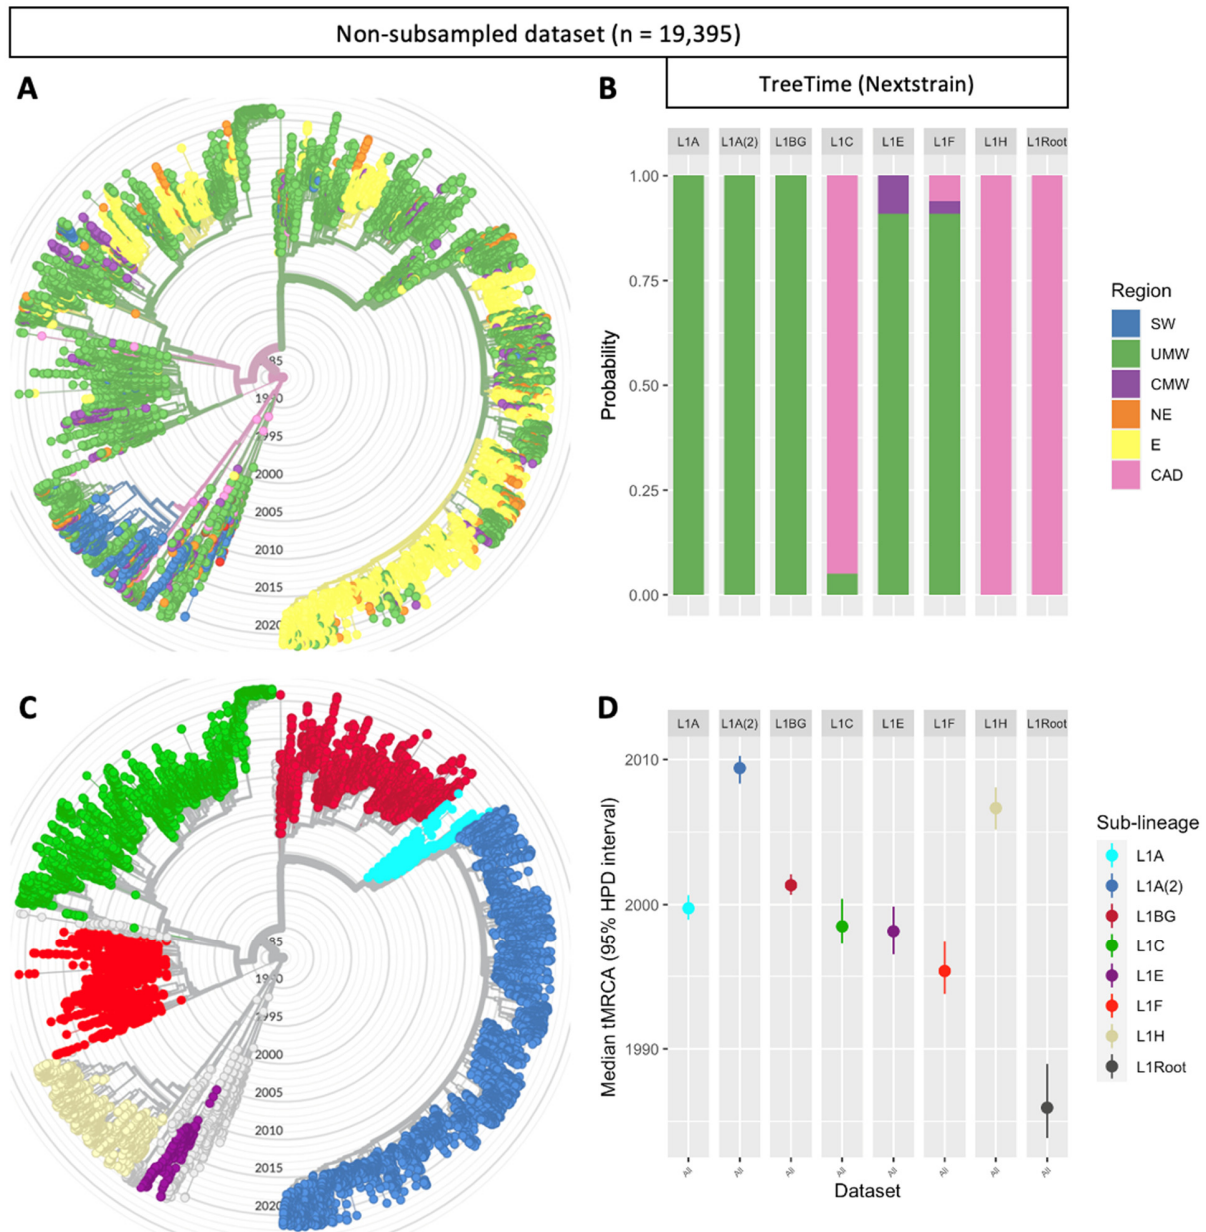

Supplementary Figure S7. Key results from TreeTime analysis on the full L1 dataset. (A) The time-scaled phylogenetic tree with tip colored by sampling region and internal branch colored by inferred ancestral region. (B) Probability (of region of origin of each L1 sub-lineage and overall L1. (C) The similar timed tree with tip colored by classified sub-lineage. (D) Median tMRCA with 95% HPD interval of L1 and its sub-lineages.

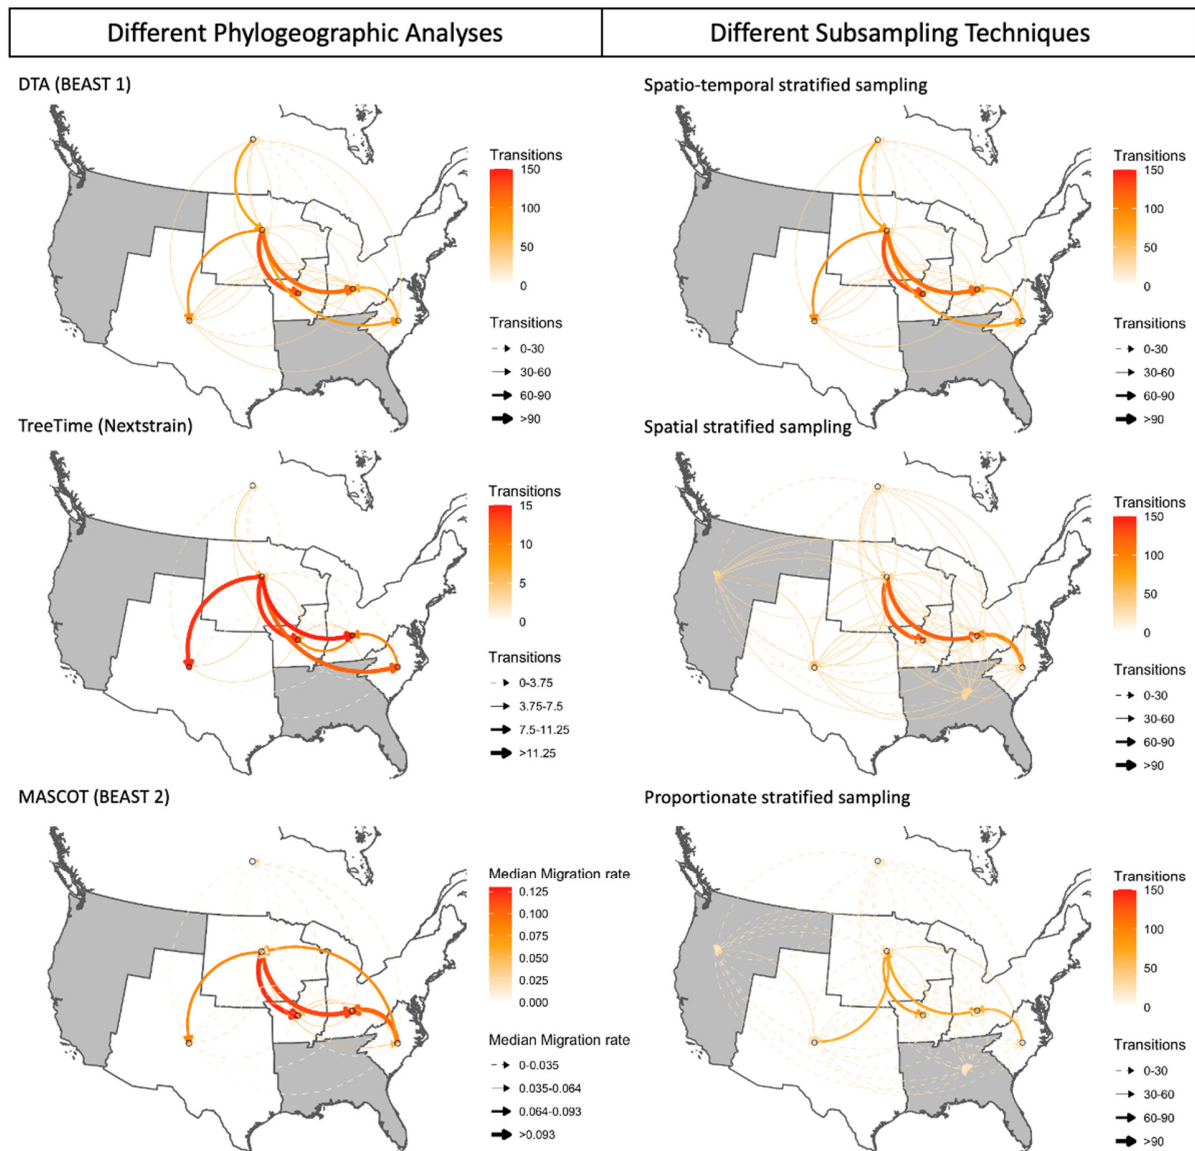

Supplementary Figure S8. Comparison of inter-regional spread of PRRSV-2 L1 in the U.S. between different phylogeographic analyses and subsampling techniques in map and arrows format.

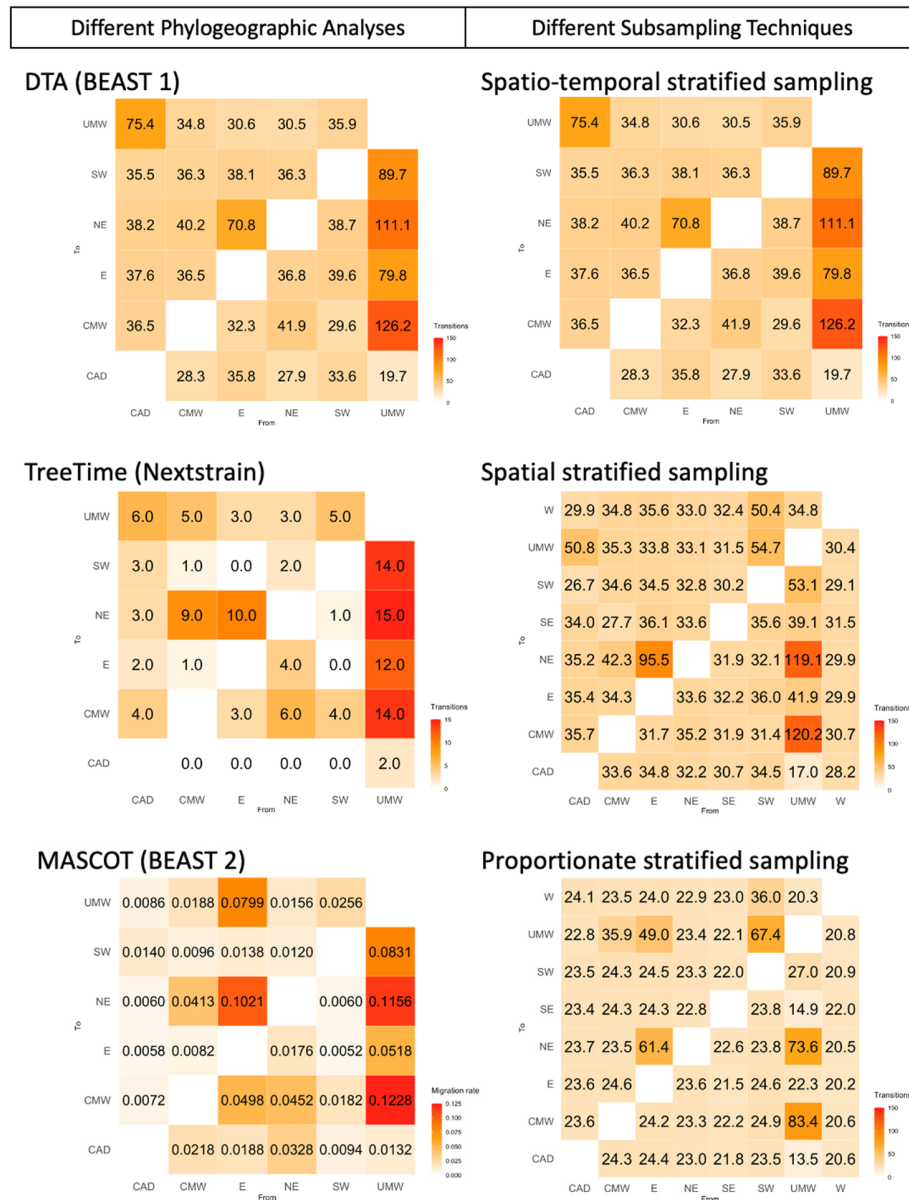

Supplementary Figure S9. Comparison of inter-regional spread of PRRSV-2 L1 in the U.S. between different phylogeographic analyses and subsampling techniques in matrix format.



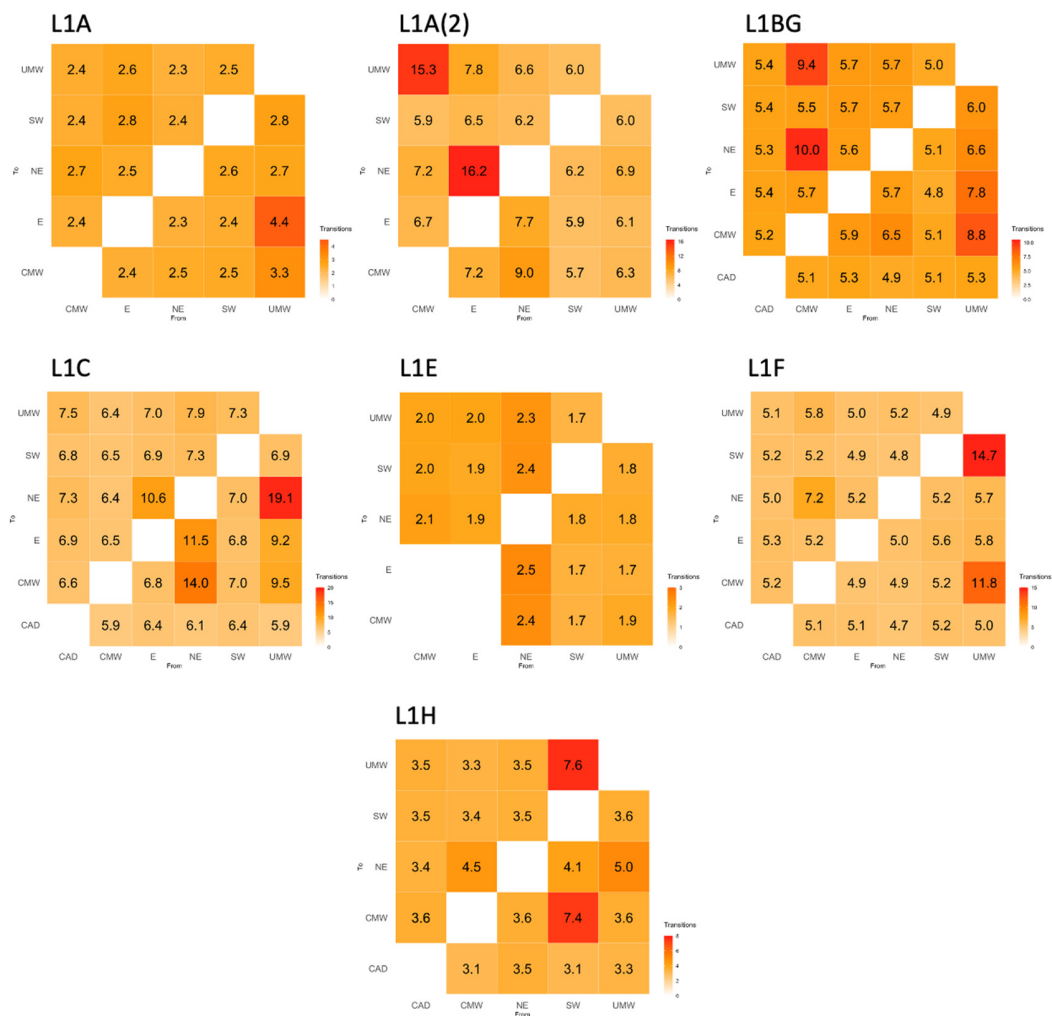

Supplementary Figure S10. Median between-region transitions of each L1 sub-lineage estimated by DTA on spatio-temporal stratified sampled sets in matrix format.

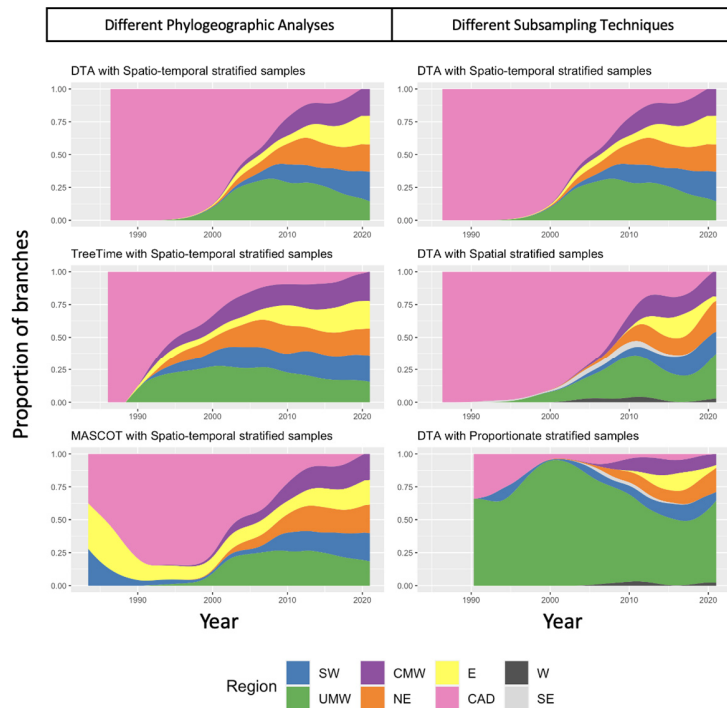

Supplementary Figure S11. Proportion of ancestral region (trait of branch) through time between different phylogeographic analyses and subsampling techniques.

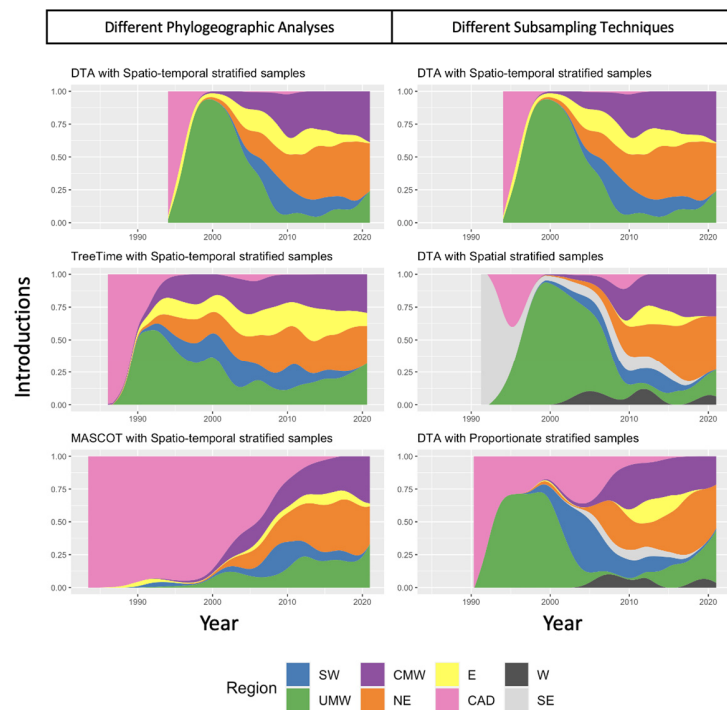

Supplementary Figure S12. Proportion of the region receiving the virus from another region (regional transition) through time between different phylogeographic analyses and subsampling techniques.

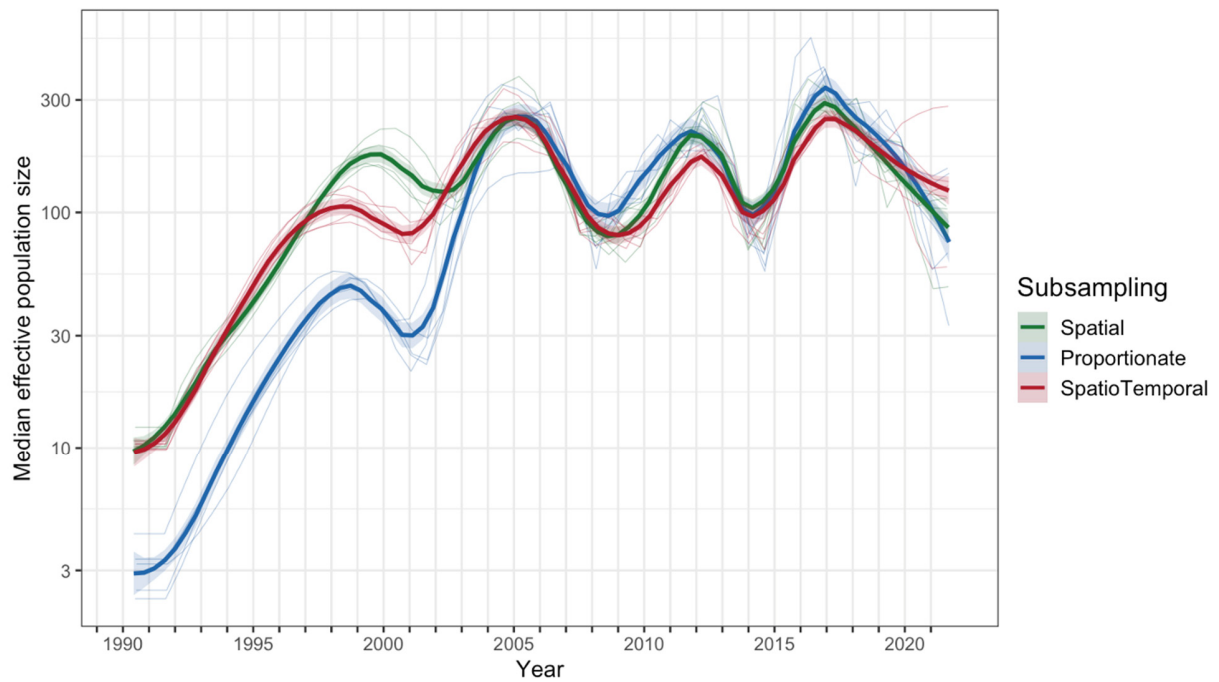

Supplementary Figure S13. Comparison of L1 population dynamics estimated by Bayesian Skygrid analysis on datasets from different subsampling techniques. Thin lines in the background are median effective population size of each run. Thick lines with bands are LOESS smoothing curve with 95% probability interval of the median population sizes from five runs of each subsampling technique. Color of line and band on the plot represents subsampling technique.

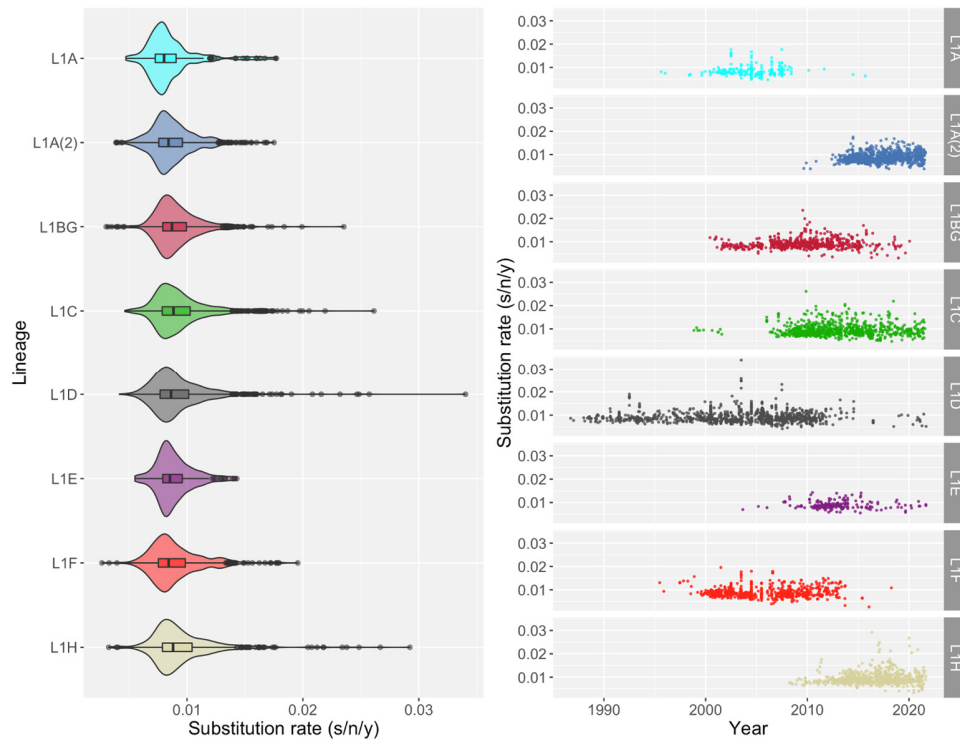

Supplementary Figure S14. Comparison of branch median substitution rate between sub-lineages (left) and temporal distribution of the rate between sub-lineages (right).

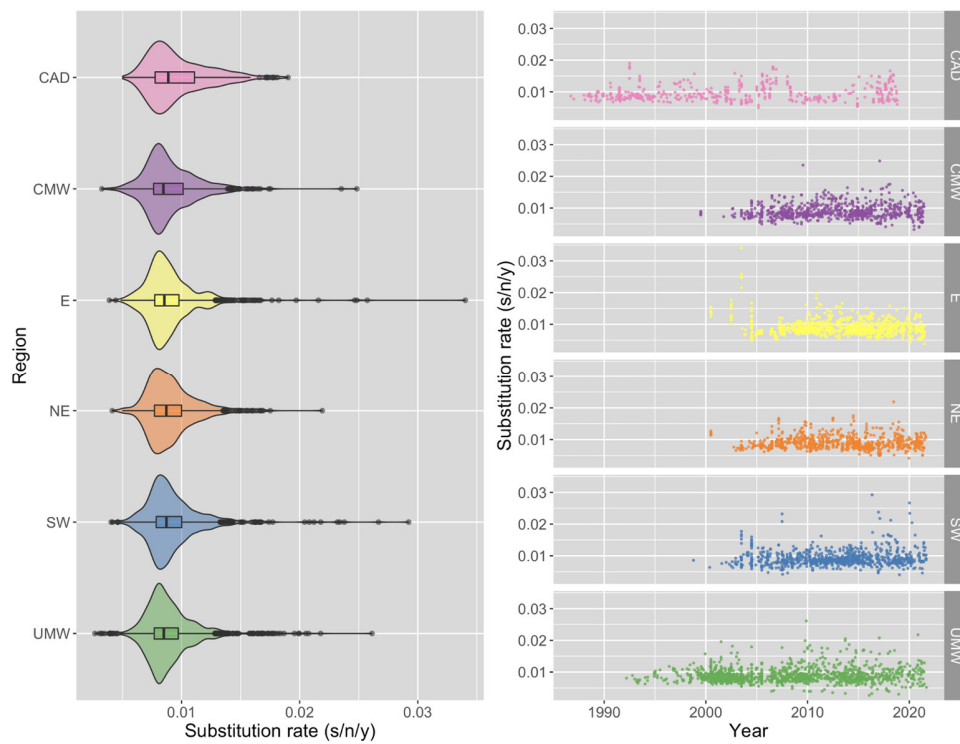

Supplementary Figure S15. Comparison of branch median substitution rate between regions (left) and temporal distribution of the rate between regions (right).

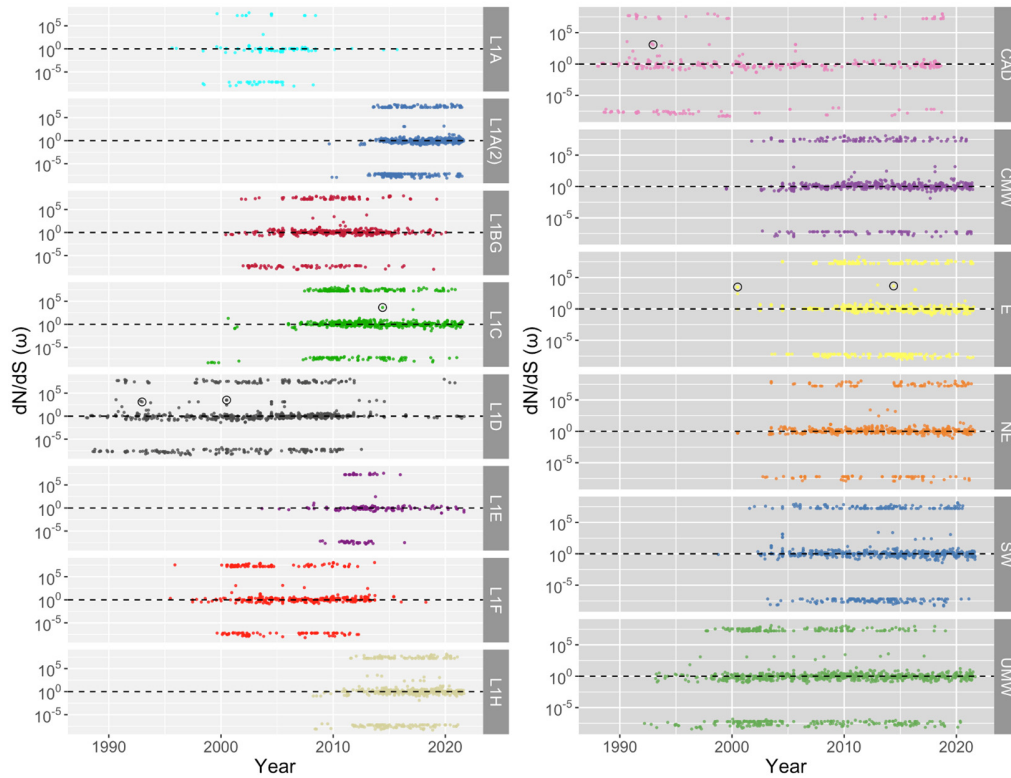

Supplementary Figure S16. Comparison of branch specific dN/dS ratio through time between sub-lineages (left) and between regions (right). Black circle locates a significant episodic positive selected branch.



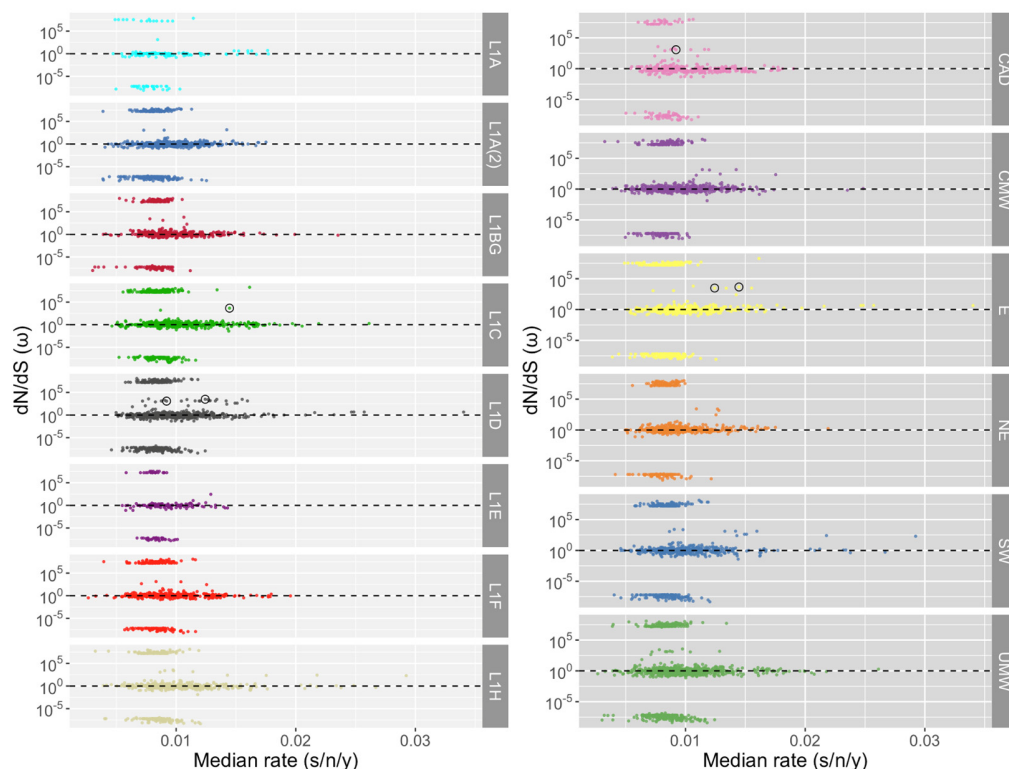

Supplementary Figure S17. Comparison of branch specific dN/dS ratio (y-axis) and substitution rate (x-axis) between sub-lineages (left) and between regions (right). Black circle locates a significant episodic positive selected branch.

Supplementary Table S1. Designated geographic regions, pig inventory, and available PRRSV-2 L1 ORF5 sequences.

| Region        | State        | 2017 US pig inventory (heads) | 2017 US pig inventory (%) | Available L1 ORF5 (sequences) | Available L1 ORF5 sequences (%) |
|---------------|--------------|-------------------------------|---------------------------|-------------------------------|---------------------------------|
| Southwest     | Arizona      | 27,692                        | 0.003                     | 46                            | 0.238                           |
| Southwest     | Utah         | 5,504,403                     | 0.624                     | 1                             | 0.005                           |
| Southwest     | Wyoming      | 1,063,747                     | 0.121                     | 24                            | 0.124                           |
| Southwest     | Colorado     | 8,479,673                     | 0.961                     | 76                            | 0.393                           |
| Southwest     | New Mexico   | 18,346                        | 0.002                     | 0                             | 0.000                           |
| Southwest     | Kansas       | 24,541,273                    | 2.781                     | 226                           | 1.170                           |
| Southwest     | Oklahoma     | 27,403,245                    | 3.106                     | 525                           | 2.718                           |
| Southwest     | Texas        | 11,221,159                    | 1.272                     | 159                           | 0.823                           |
| Upper Midwest | North Dakota | 1,971,079                     | 0.223                     | 1                             | 0.005                           |
| Upper Midwest | South Dakota | 19,998,670                    | 2.266                     | 103                           | 0.533                           |
| Upper Midwest | Nebraska     | 42,995,739                    | 4.873                     | 423                           | 2.190                           |

|                        |                |                      |        |       |        |
|------------------------|----------------|----------------------|--------|-------|--------|
| <b>Upper Midwest</b>   | Minnesota      | 104,954,069          | 11.894 | 7,356 | 38.084 |
| <b>Upper Midwest</b>   | Iowa           | 278,658,346          | 31.580 | 2,490 | 12.892 |
| <b>Upper Midwest</b>   | Wisconsin      | 3,354,146            | 0.380  | 11    | 0.057  |
| <b>Central Midwest</b> | Missouri       | 40,698,393           | 4.612  | 234   | 1.211  |
| <b>Central Midwest</b> | Illinois       | 66,899,427           | 7.582  | 593   | 3.070  |
| <b>Northeast</b>       | Michigan       | 15,096,398           | 1.711  | 12    | 0.062  |
| <b>Northeast</b>       | Indiana        | 49,709,257           | 5.634  | 260   | 1.346  |
| <b>Northeast</b>       | Kentucky       | 4,737,803            | 0.537  | 6     | 0.031  |
| <b>Northeast</b>       | Ohio           | 31,232,937           | 3.540  | 161   | 0.834  |
| <b>Northeast</b>       | West Virginia  | 46,973               | 0.005  | 0     | 0.000  |
| <b>Northeast</b>       | Maryland       | 162,713              | 0.018  | 0     | 0.000  |
| <b>Northeast</b>       | Delaware       | 46,898               | 0.005  | 0     | 0.000  |
| <b>Northeast</b>       | Pennsylvania   | 14,747,532           | 1.671  | 34    | 0.176  |
| <b>Northeast</b>       | New Jersey     | 76,678               | 0.009  | 0     | 0.000  |
| <b>Northeast</b>       | New York       | 489,548              | 0.055  | 0     | 0.000  |
| <b>Northeast</b>       | Connecticut    | 30,037               | 0.003  | 0     | 0.000  |
| <b>Northeast</b>       | Rhode Island   | 15,004               | 0.002  | 0     | 0.000  |
| <b>Northeast</b>       | Vermont        | 41,779               | 0.005  | 0     | 0.000  |
| <b>Northeast</b>       | New Hampshire  | 27,026               | 0.003  | 0     | 0.000  |
| <b>Northeast</b>       | Massachusetts  | 37,094               | 0.004  | 0     | 0.000  |
| <b>Northeast</b>       | Maine          | 39,058               | 0.004  | 0     | 0.000  |
| <b>East</b>            | Virginia       | 3,192,298            | 0.362  | 33    | 0.171  |
| <b>East</b>            | North Carolina | 107,021,897          | 12.129 | 6,389 | 33.078 |
| <b>East</b>            | South Carolina | 2,068,421            | 0.234  | 132   | 0.683  |
| <b>West</b>            | Washington     | 139,245              | 0.016  | 0     | 0.000  |
| <b>West</b>            | Oregon         | 99,375               | 0.011  | 0     | 0.000  |
| <b>West</b>            | California     | 826,252              | 0.094  | 12    | 0.062  |
| <b>West</b>            | Nevada         | 5,510                | 0.001  | 0     | 0.000  |
| <b>West</b>            | Idaho          | 167,762              | 0.019  | 0     | 0.000  |
| <b>West</b>            | Montana        | 2,366,551            | 0.268  | 0     | 0.000  |
| <b>Southeast</b>       | Arkansas       | 1,453,385            | 0.165  | 7     | 0.036  |
| <b>Southeast</b>       | Louisiana      | 53,068               | 0.006  | 0     | 0.000  |
| <b>Southeast</b>       | Tennessee      | 2,661,681            | 0.302  | 0     | 0.000  |
| <b>Southeast</b>       | Mississippi    | 6,416,420            | 0.727  | 0     | 0.000  |
| <b>Southeast</b>       | Alabama        | 521,985              | 0.059  | 0     | 0.000  |
| <b>Southeast</b>       | Georgia        | 929,804              | 0.105  | 1     | 0.005  |
| <b>Southeast</b>       | Florida        | 130,663              | 0.015  | 0     | 0.000  |
| <b>Canada</b>          | NA             | 14,091,503<br>(2016) | NA     | 80    | NA     |

Supplementary Table S2. Parameter settings in different phylogeographic approaches.

| Software                               | BEAST v1.10.4                                       | TreeTime v0.8.5                                                                                     | BEAST v2.5.1                                                                     |
|----------------------------------------|-----------------------------------------------------|-----------------------------------------------------------------------------------------------------|----------------------------------------------------------------------------------|
| Datasets used                          | All subsampled datasets (n = 15, 500 seqs each)     | Spatio-temporal subsampled datasets (n = 5, 500 seqs each) and non-subsampled dataset (19,395 seqs) | Spatio-temporal subsampled datasets (n = 5*, 500 seqs each)                      |
| Nucleotide substitution model          | GTR + I + G                                         | GTR                                                                                                 | GTR + G                                                                          |
| Molecular clock model                  | Uncorrelated relaxed clock, Log-normal distribution | Strict clock                                                                                        | Uncorrelated relaxed clock, Log-normal distribution                              |
| Model for phylogeography               | Non-reversible CTMC (DTA)                           | GTR (migration model)                                                                               | Marginal approximation of the structured coalescent (MASCOT)                     |
| Coalescent model (population dynamics) | Bayesian GMRF Skygrid                               | Constant coalescent rate                                                                            | Structured coalescent with constant effective population size and migration rate |
| MCMC chain length                      | 300 million                                         | No MCMC running                                                                                     | 300 million                                                                      |

\*Only 4 out of 5 datasets could be accomplished in BEAST 2 without error. (Potential errors: <https://taming-the-beast.org/tutorials/Mascot-Tutorial/>)
